# Supplementary material for: Genomic signatures define three subtypes of EGFR-mutant stage II–III non-small-cell lung cancer with distinct adjuvant therapy outcomes
Source: PubMed Central journal article supplement (PMC8575965; doi:10.1038/s41467-021-26806-7), 2021-11-08
Supplement: 41467_2021_26806_MOESM1_ESM.pdf [file 41467_2021_26806_MOESM1_ESM.pdf]

**Supplementary Figure 1. Mutational landscape of all available samples from ADJUVANT-CTONG1104 by Targeted NGS.**  
 Only genes that have  $\geq 5\%$  mutation frequency in both VP and gefitinib treatment groups were displayed.

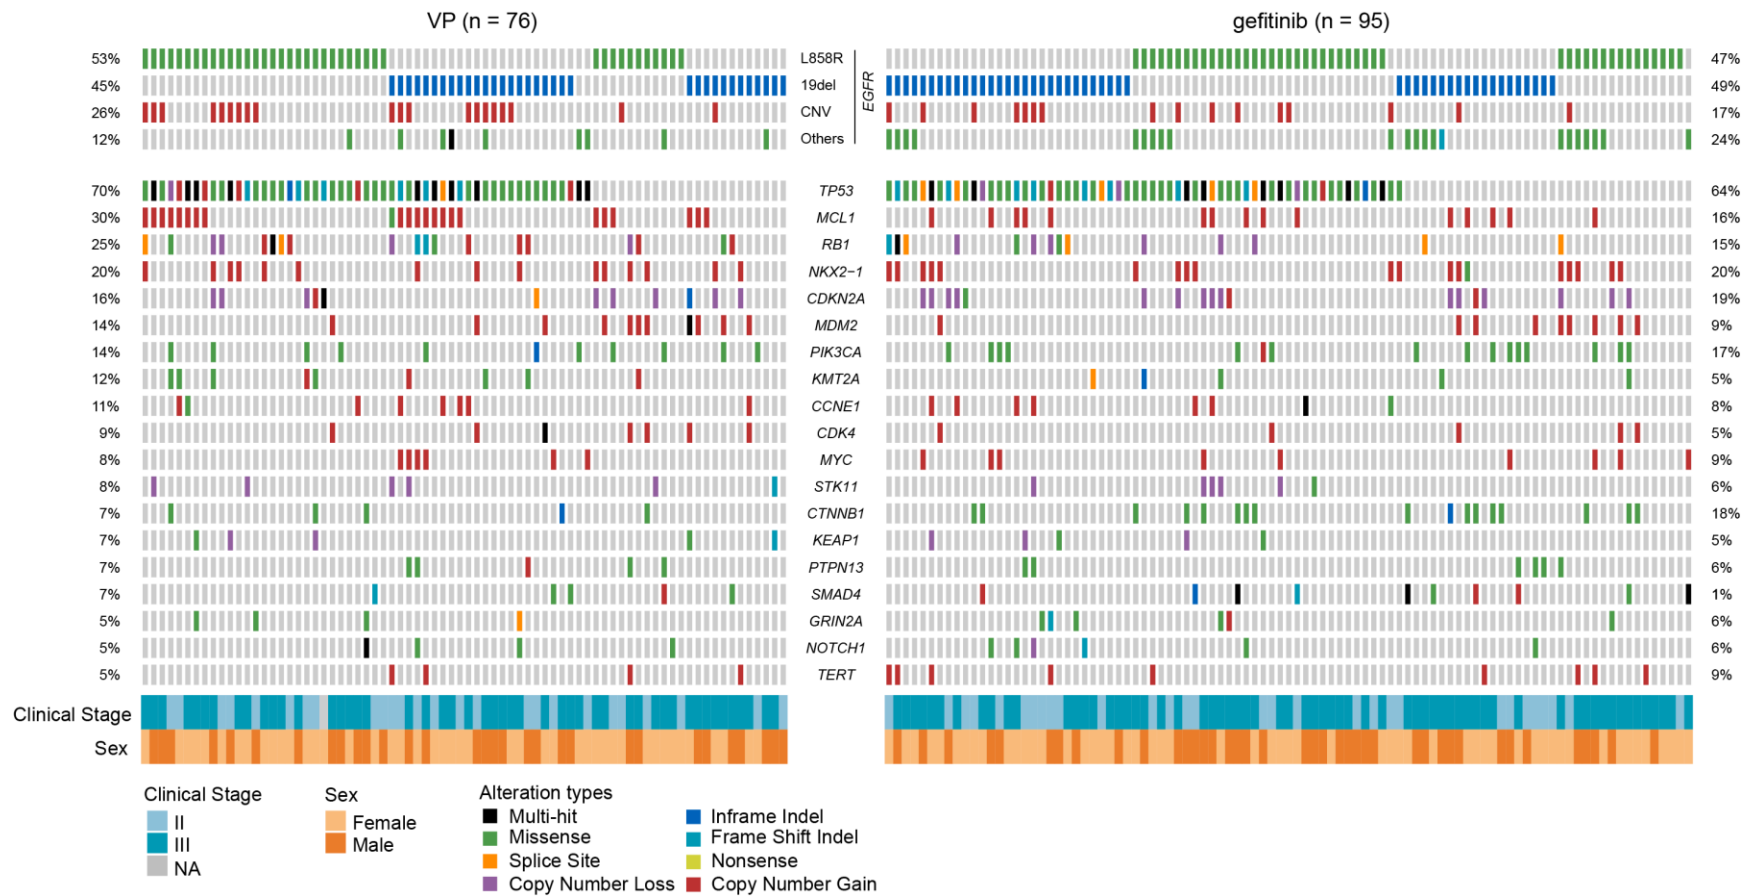

Supplementary Figure 2. Schematic diagram of predictive and prognostic biomarkers for adjuvant TKI and chemotherapy

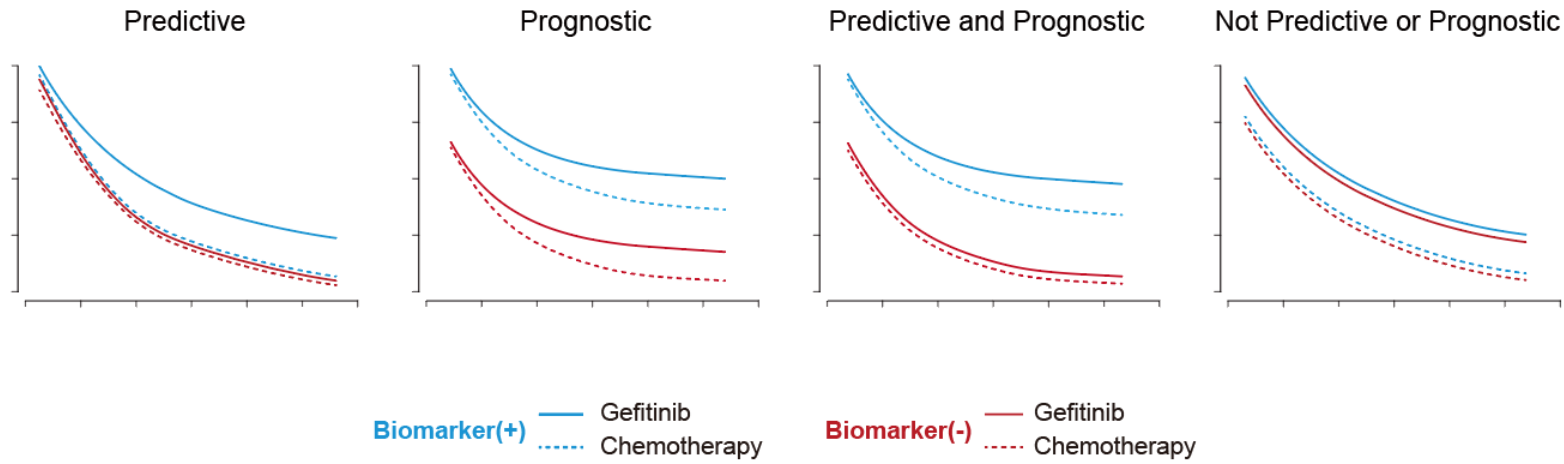

### Supplementary Figure 3. Prognostic markers in the exploratory cohort from the ADJUVANT/CTONG1104 study

Kaplan-Meier survival plots showing a) *TP53* exons 4-5 missense mutations, b) *TP53* frameshift and truncating mutations, c) *PIK3CA* mutations, d) *NOTCH1* mutations, and e) *MYC* copy number gain (CNV) positive or negative populations in gefitinib or VP treated arms.

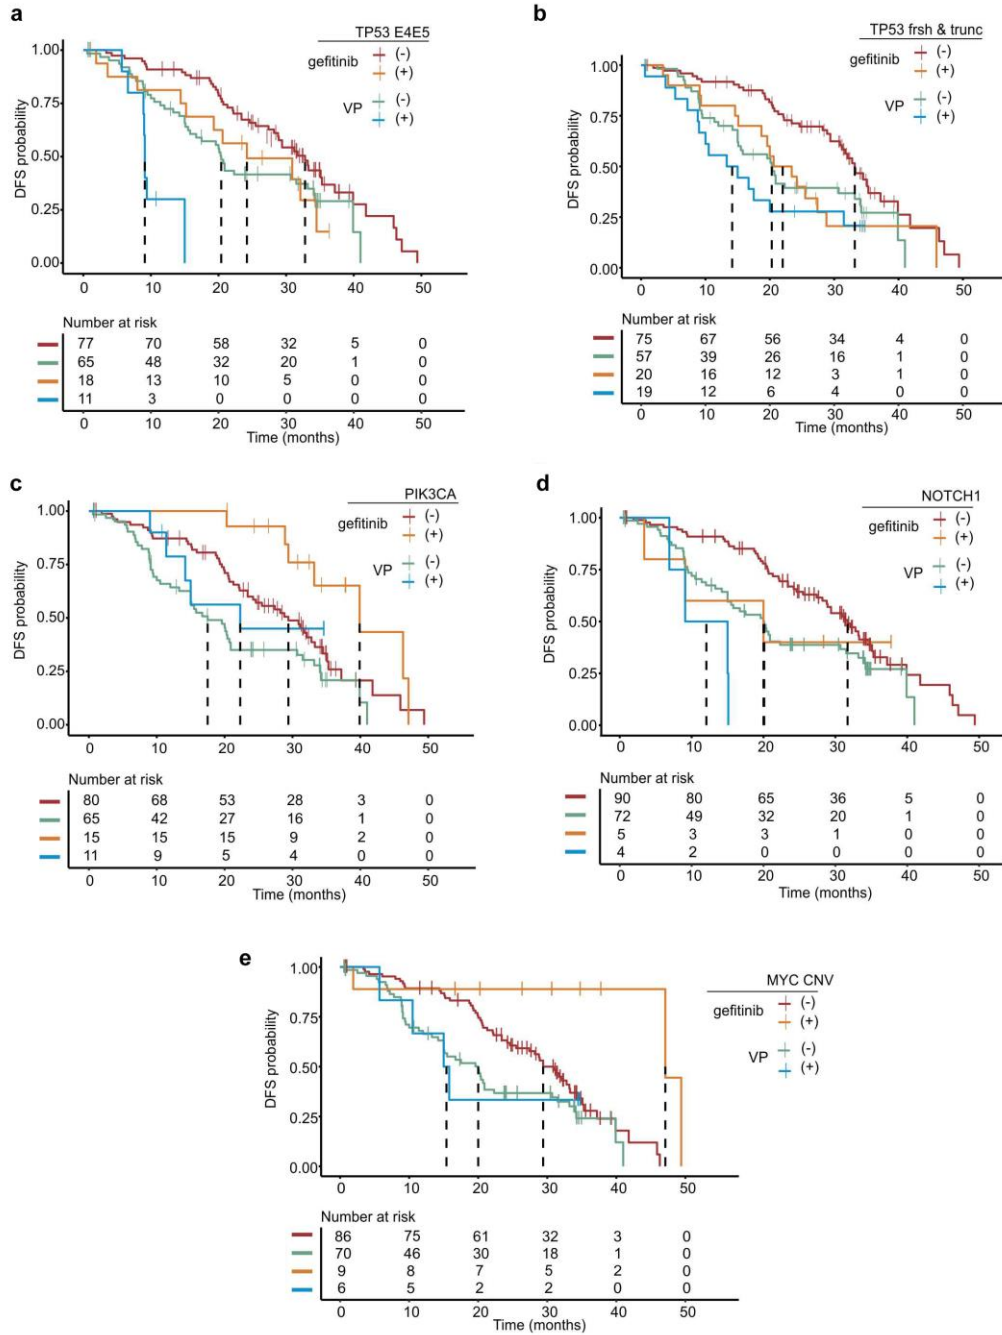

**Supplementary Figure 4. Three subgroups identified from MINERVA.**

a) Histogram shows the distribution of MINERVA score in entire cohort. b) Comparison of survival differences under different cutoffs of MINERVA. P values are derived from two-sided wald test of the cox proportional hazards regression model.

**a**

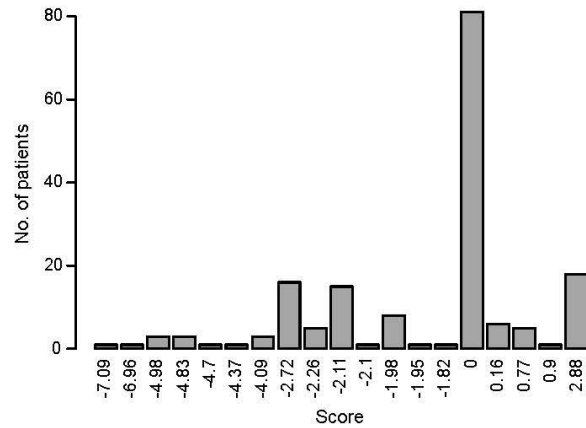

**b**

| cutoffs at   | HTP                                                    | TP                                      | CP                                      |
|--------------|--------------------------------------------------------|-----------------------------------------|-----------------------------------------|
| -0.5 and 0.5 | n = 60<br>0.21 (0.1-0.44)<br>p < 2.47x10 <sup>-5</sup> | n = 87<br>0.61 (0.35-1.07)<br>p = 0.083 | n = 24<br>3.06 (0.99-9.53)<br>p = 0.041 |
| 0            | Same as above                                          | n = 81<br>0.65 (0.36-1.16)<br>p = 0.15  | n = 30<br>2.26 (0.87-5.88)<br>p = 0.084 |
| -1 and 1     | Same as above                                          | n = 93<br>0.66 (0.39-1.12)<br>p = 0.12  | n = 18<br>3.95 (0.94-16.56)<br>p = 0.06 |

**Supplementary Figure 5. Analysis of overall survival by prespecified subgroups in the exploratory cohort from ADJUVANT-CTONG1104.** Forest plot showing the hazard ratio of overall survival between adjuvant gefitinib and vinorelbine/cisplatin chemotherapy (VP) using the cox proportional hazards regression model in prespecified patient subgroups. Error bars indicating 95% confidence intervals of hazard ratios. P values are derived from two-sided wald test of the cox proportional hazards regression model.

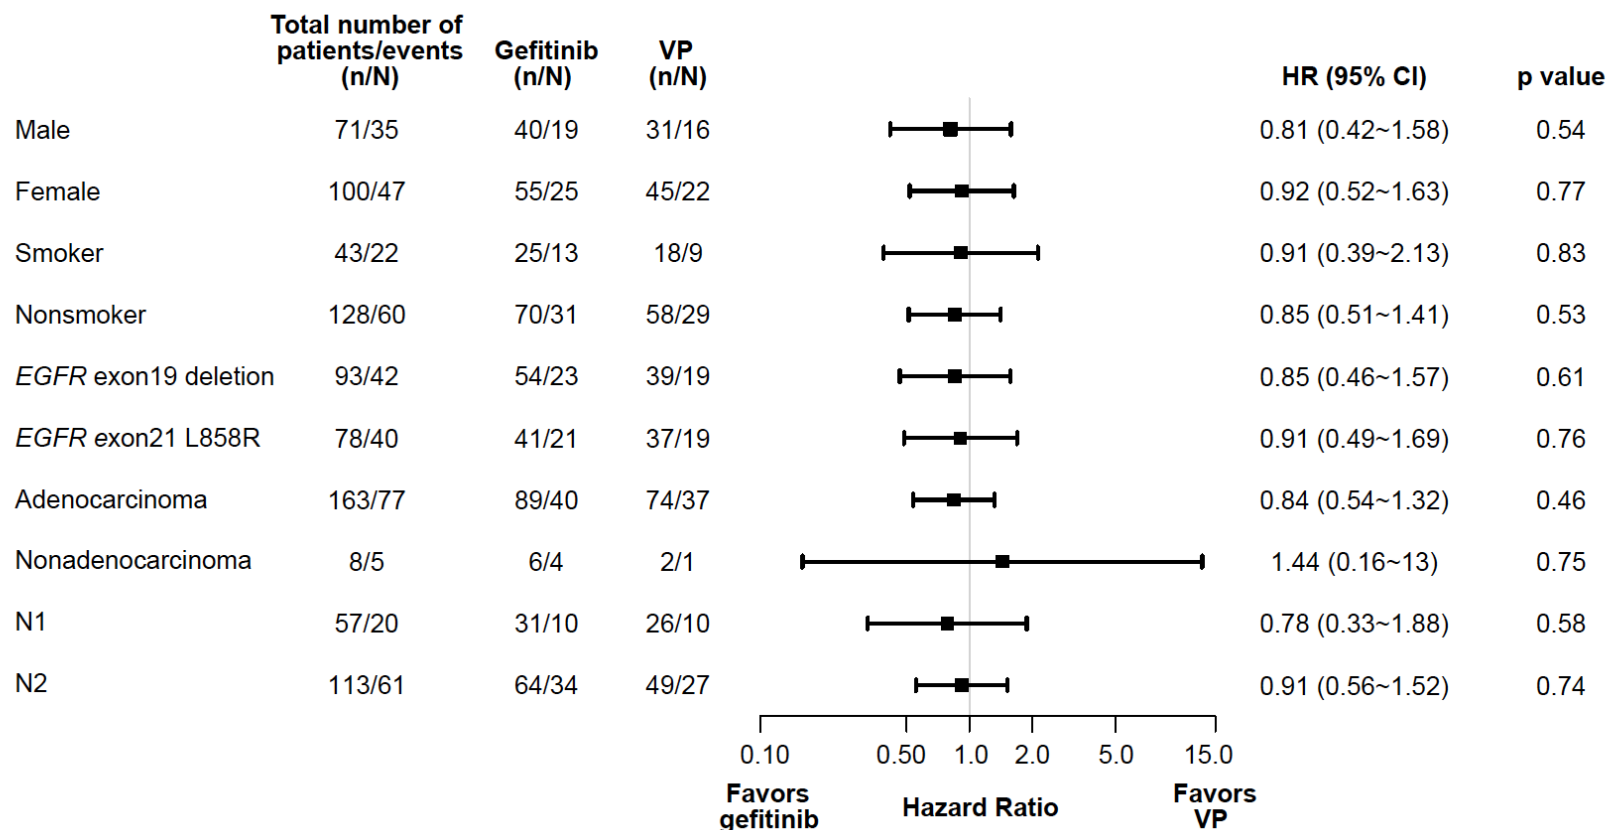

### Supplementary Figure 6. Two-year, three-year and five-year overall survival rates in MINERVA stratified patients.

Bar graphs illustrate two-, three- and five-year overall survival rate of the entire pre-stratified cohort (n=171) and three MINERVA score groups (HTP, n=60; TP, n=87; CP, n=24). Error bars indicate 95% confidence interval of survival rates.

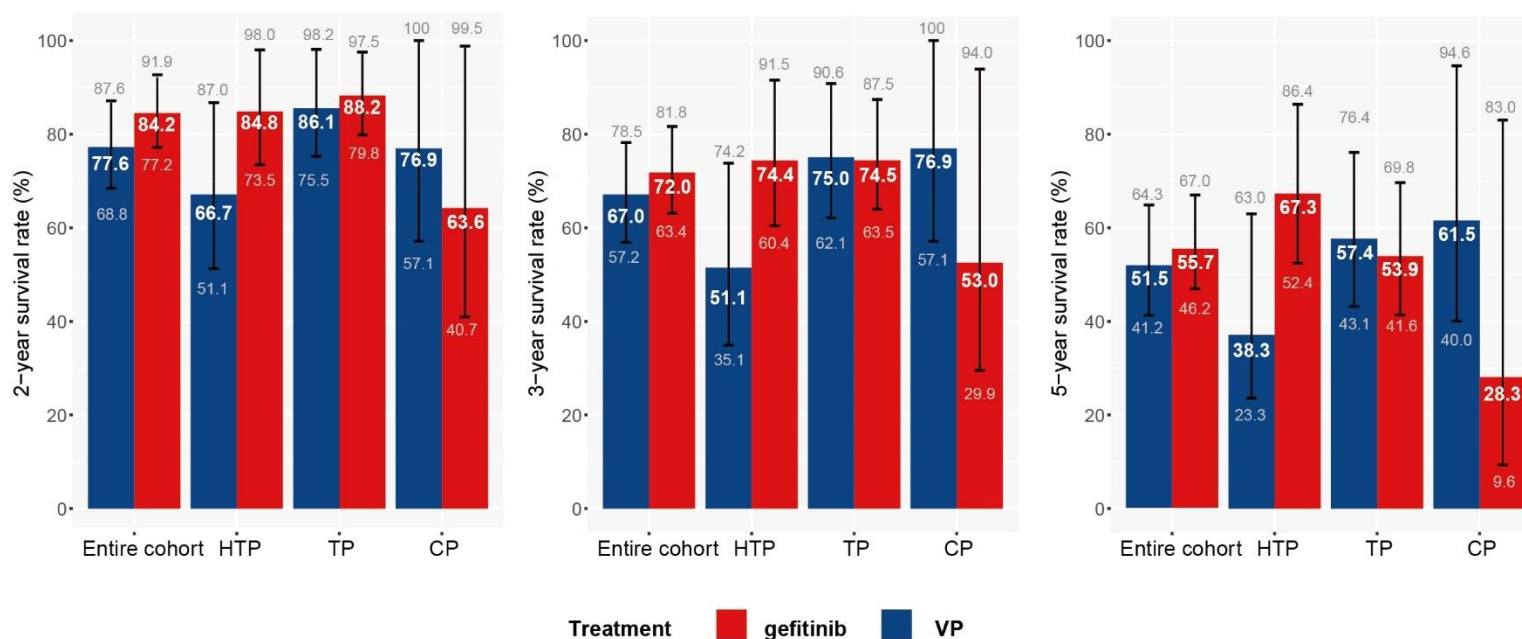

**Supplementary Figure 7. Validation of MINERVA in an independent cohort of 29 patients from the EMERGING-CTONG1103 trial.** a) Kaplan-Meier curve demonstrating survival of all 29 patients with two-side P value obtained from log-rank test; b) Treatment interaction of MINERVA scores in as a composite variable in ADJUVANT and EMERGING cohorts. P values are derived from two-sided wald test of the cox proportional hazards regression model. c-e) Kaplan-Meier curves of PFS for patients treated by neoadjuvant erlotinib or chemotherapy in three MINERVA subgroups in the independent validation cohort. P values are calculated using two-sided log-rank test.

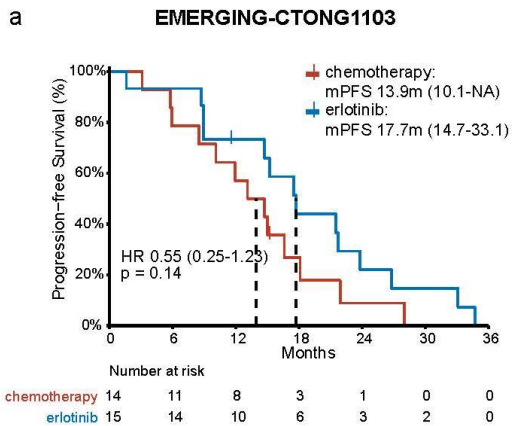

**b**

|                 | ADJUVANT-CTONG1104 |                       | EMERGING-CTONG1103 |         |
|-----------------|--------------------|-----------------------|--------------------|---------|
|                 | HR                 | P-value               | HR                 | P-value |
| Score*Treatment | 1.64               | 4.29x10 <sup>-6</sup> | 4.61               | 0.00032 |
| Score           | 0.72               | 1.9x10 <sup>-5</sup>  | 0.34               | 0.004   |
| Treatment       | 0.62               | 0.027                 | 0.56               | 0.19    |

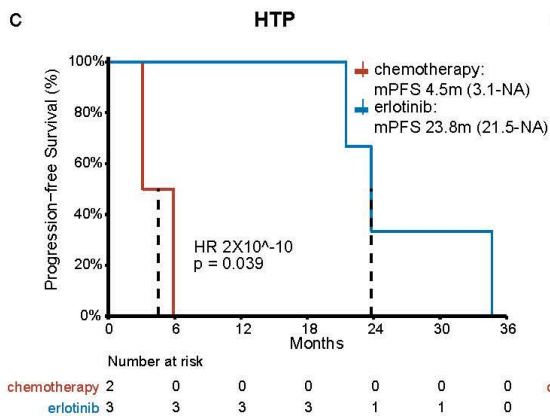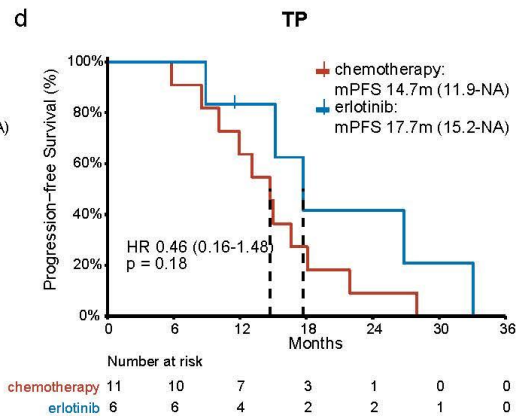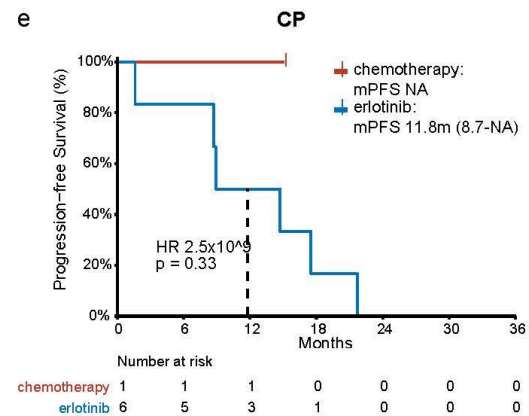

**Supplementary Table 1. Summary of basic characteristics in the exploratory cohort from ADJUVANT-CTONG1104**

|                                              | <b>Exploratory cohort</b> |                                         |
|----------------------------------------------|---------------------------|-----------------------------------------|
|                                              | Gefitinib<br>(n=95)       | Vinorelbine plus<br>cisplatin<br>(n=76) |
| <b>Age (years)</b>                           | 58 (32-74)                | 59 (26-73)                              |
| <b>Sex</b>                                   |                           |                                         |
| Female                                       | 55 (58%)                  | 45 (59%)                                |
| Male                                         | 40 (42%)                  | 31 (41%)                                |
| <b>Never smoker</b>                          | 70 (74%)                  | 58 (76%)                                |
| <b>ECOG</b>                                  |                           |                                         |
| 0-1                                          | 93 (98%)                  | 76 (100%)                               |
| Not available                                | 2 (2%)                    | 0                                       |
| <b>Pathology stage</b>                       |                           |                                         |
| IIA                                          | 27 (28%)                  | 24 (32%)                                |
| IIB                                          | 4 (4%)                    | 2 (3%)                                  |
| IIIA                                         | 65 (68%)                  | 49 (64%)                                |
| Not available                                | 0                         | 1 (1%)                                  |
| <b>Lymph node status</b>                     |                           |                                         |
| N1                                           | 31 (33%)                  | 26 (34%)                                |
| N2                                           | 64 (67%)                  | 49 (65%)                                |
| Not available                                | 0                         | 1 (1%)                                  |
| <b>Pathology</b>                             |                           |                                         |
| Adenocarcinoma                               | 89 (93%)                  | 74 (97%)                                |
| Squamous carcinoma                           | 4 (5%)                    | 0                                       |
| Adenosquamous carcinoma                      | 2 (2%)                    | 2 (3%)                                  |
| Other                                        | 0                         | 0                                       |
| <b>EGFR sensitive mutation status by NGS</b> |                           |                                         |
| Exon 19 deletion                             | 50 (53%)                  | 36 (47%)                                |
| Exon 21 L858R                                | 45 (47%)                  | 40 (53%)                                |

Data are median(range) or number of patients (%)  
 ECOG = Eastern Cooperative Oncology Group



**Supplementary Table 2. Multivariate cox proportional hazard regression of predictive biomarkers and clinical status**

|                                                                           | Coefficient | HR<br>(95% CI)       | Standard<br>error of<br>coefficient | z      | p value               |     |
|---------------------------------------------------------------------------|-------------|----------------------|-------------------------------------|--------|-----------------------|-----|
| <b>RB1</b>                                                                |             |                      |                                     |        |                       |     |
| <i>RB1</i> alterations                                                    | -0.404      | 0.67<br>(0.35-1.26)  | 0.3243                              | -1.247 | 0.21                  |     |
| Treatments<br>(Gefitinib vs VP)                                           | -0.959      | 0.38<br>(0.24-0.603) | 0.2317                              | -4.141 | 3.46*10 <sup>-5</sup> | *** |
| Interaction<br>between<br>treatments and<br><i>RB1</i> alterations        | 1.376       | 3.96<br>(1.51-10.4)  | 0.4909                              | 2.803  | 0.005                 | **  |
| Age                                                                       | -0.00047    | 1.00<br>(0.98-1.02)  | 0.0117                              | -0.040 | 0.97                  |     |
| Sex                                                                       | 0.277       | 1.32<br>(0.75-2.32)  | 0.2885                              | 0.962  | 0.34                  |     |
| Smoking history                                                           | 0.302       | 1.35<br>(0.72-2.54)  | 0.3222                              | 0.938  | 0.35                  |     |
| Clinical stage                                                            | 0.088       | 1.09<br>(0.22-5.38)  | 0.8142                              | 0.108  | 0.91                  |     |
| N stage                                                                   | 0.496       | 1.64<br>(0.34-7.97)  | 0.8064                              | 0.615  | 0.54                  |     |
| <b>NKX2-1</b>                                                             |             |                      |                                     |        |                       |     |
| <i>NKX2-1</i> copy<br>number gain                                         | 1.158       | 3.18<br>(1.69-6.02)  | 0.3246                              | 3.568  | 3.60*10 <sup>-4</sup> | *** |
| Treatment<br>(Gefitinib vs VP)                                            | -0.430      | 0.65<br>(0.42-1.02)  | 0.2280                              | -1.888 | 0.059                 | .   |
| Interaction<br>between treatment<br>and <i>NKX2-1</i> copy<br>number gain | -1.410      | 0.24<br>(0.091-0.66) | 0.5057                              | -2.789 | 0.005                 | **  |
| Age                                                                       | -0.010      | 0.99<br>(0.97-1.01)  | 0.0115                              | -0.855 | 0.39                  |     |
| Sex                                                                       | 0.272       | 1.31<br>(0.75-2.3)   | 0.2855                              | 0.952  | 0.34                  |     |
| Smoking history                                                           | 0.234       | 1.26<br>(0.68-2.36)  | 0.3187                              | 0.733  | 0.46                  |     |
| Clinical stage                                                            | -0.038      | 0.96<br>(0.21-4.39)  | 0.7737                              | -0.049 | 0.96                  |     |
| N stage                                                                   | 0.617       | 1.85<br>(0.41-8.31)  | 0.7659                              | 0.805  | 0.42                  |     |
| <b>CDK4</b>                                                               |             |                      |                                     |        |                       |     |

|                                                                          | Coefficient | HR<br>(95% CI)       | Standard<br>error of<br>coefficient | z      | p value               |     |
|--------------------------------------------------------------------------|-------------|----------------------|-------------------------------------|--------|-----------------------|-----|
| <i>CDK4</i> copy number gain                                             | 0.852       | 2.34<br>(0.91-6.02)  | 0.4811                              | 1.772  | 0.076                 | .   |
| Treatment (Gefitinib vs VP)                                              | -0.591      | 0.55<br>(0.37-0.83)  | 0.2081                              | -2.839 | 0.005                 | **  |
| Interaction between treatment and <i>CDK4</i> copy number gain           | -1.933      | 0.15<br>(0.026-0.81) | 0.8792                              | -2.199 | 0.028                 | *   |
| Age                                                                      | -0.003      | 1.00<br>(0.98-1.02)  | 0.0115                              | -0.225 | 0.82                  |     |
| Sex                                                                      | 0.300       | 1.35<br>(0.77-2.38)  | 0.2897                              | 1.037  | 0.30                  |     |
| Smoking history                                                          | 0.300       | 1.35<br>(0.72-2.53)  | 0.3215                              | 0.932  | 0.35                  |     |
| Clinical stage                                                           | -0.021      | 0.98<br>(0.22-4.4)   | 0.7667                              | -0.027 | 0.98                  |     |
| N stage                                                                  | 0.599       | 1.82<br>(0.41-8.07)  | 0.7596                              | 0.789  | 0.43                  |     |
| <b>TP53</b>                                                              |             |                      |                                     |        |                       |     |
| <i>TP53</i> exon4/5 missense mut                                         | 1.634       | 5.12<br>(2.34-11.2)  | 0.4002                              | 4.082  | 4.46*10 <sup>-5</sup> | *** |
| Treatment (Gefitinib vs VP)                                              | -0.673      | 0.51<br>(0.33-0.80)  | 0.2262                              | -2.976 | 0.003                 | **  |
| Interaction between treatment and <i>TP53</i> exon4/5 missense mutations | -1.023      | 0.36<br>(0.13-1.01)  | 0.5282                              | -1.937 | 0.053                 | .   |
| Age                                                                      | -0.003      | 1.00<br>(0.98-1.02)  | 0.0116                              | -0.219 | 0.83                  |     |
| Sex                                                                      | 0.319       | 1.38<br>(0.78-2.43)  | 0.2910                              | 1.096  | 0.27                  |     |
| Smoking history                                                          | 0.362       | 1.44<br>(0.76-2.71)  | 0.3234                              | 1.120  | 0.26                  |     |
| Clinical stage                                                           | 0.075       | 1.08<br>(0.22-5.26)  | 0.8086                              | 0.092  | 0.93                  |     |
| N stage                                                                  | 0.525       | 1.69<br>(0.35-8.09)  | 0.7988                              | 0.657  | 0.51                  |     |
| <b>MYC</b>                                                               |             |                      |                                     |        |                       |     |
| <i>MYC</i> copy number gain                                              | -0.035      | 0.97<br>(0.34-2.73)  | 0.5295                              | -0.065 | 0.95                  |     |
| Treatments (Gefitinib vs VP)                                             | -0.575      | 0.56<br>(0.38-0.85)  | 0.2074                              | -2.773 | 0.006                 | **  |

|                                                                            | <b>Coefficient</b> | <b>HR<br/>(95% CI)</b>     | <b>Standard<br/>error of<br/>coefficient</b> | <b>z</b> | <b>p value</b> |
|----------------------------------------------------------------------------|--------------------|----------------------------|----------------------------------------------|----------|----------------|
| Interaction<br>between<br>treatments and<br><i>MYC</i> copy number<br>gain | -2.390             | 0.092<br>(0.0094-<br>0.90) | 1.1629                                       | -2.055   | 0.04           |
| Age                                                                        | -0.006             | 0.99<br>(0.97-1.02)        | 0.0114                                       | -0.525   | 0.60           |
| Sex                                                                        | 0.179              | 1.20<br>(0.67-2.13)        | 0.2943                                       | 0.607    | 0.54           |
| Smoking history                                                            | 0.152              | 1.16<br>(0.61-2.22)        | 0.3304                                       | 0.460    | 0.65           |
| Clinical stage                                                             | -0.041             | 0.96<br>(0.22-4.20)        | 0.7531                                       | -0.054   | 0.96           |
| N stage                                                                    | 0.666              | 1.95<br>(0.45-8.43)        | 0.7479                                       | 0.891    | 0.37           |

\*

VP, adjuvant chemotherapy regimen of vinorelbine plus cisplatin.

HR, hazard ratio;

CI, confidence interval;

P values are derived from two-sided wald test of the cox proportional hazards regression model.

Significant codes: '\*\*\*', p<0.001; '\*\*', p<0.01; '\*', p<0.05; '.', p<0.1.

**Supplementary Table 3. Interaction between treatments and *RB1* alteration**

|                                                                | <b>Recurrence events/<br/>No. of Patients</b> | <b>Coefficient</b> | <b>HR<br/>(95% CI)</b> | <b>Standard error of coefficient</b> | <b>z</b> | <b>p value</b>            |
|----------------------------------------------------------------|-----------------------------------------------|--------------------|------------------------|--------------------------------------|----------|---------------------------|
| <b><i>RB1</i> mutations</b>                                    | 15/23                                         | -0.34              | 0.71<br>(0.37-1.40)    | 0.343                                | -0.98    | 0.33                      |
| Treatments (Gefitinib vs VP)                                   |                                               | -0.75              | 0.47<br>(0.31-0.72)    | 0.217                                | -3.47    | 5.14*10 <sup>-4</sup> *** |
| Interaction between treatments and <i>RB1</i> mutations        |                                               | 1.21               | 3.34<br>(0.96-11.60)   | 0.634                                | 1.90     | 0.06.                     |
| <b><i>RB1</i> copy number loss</b>                             | 8/10                                          | -0.39              | 0.68<br>(0.16-2.80)    | 0.724                                | -0.54    | 0.59                      |
| Treatments (Gefitinib vs VP)                                   |                                               | -0.72              | 0.49<br>(0.33-0.73)    | 0.207                                | -3.45    | 5.55*10 <sup>-4</sup> *** |
| Interaction between treatments and <i>RB1</i> copy number loss |                                               | 1.35               | 3.86<br>(0.74-20.20)   | 0.844                                | 1.60     | 0.11                      |

VP, adjuvant chemotherapy regimen of vinorelbine plus cisplatin.

HR, hazard ratio;

CI, confidence interval;

P values are derived from two-sided wald test of the cox proportional hazards regression model.

Significant codes: '\*\*\*', p<0.001; '\*\*', p<0.01; '\*', p<0.05; '.', p<0.1.

**Supplementary Table 4. Multivariate cox proportional hazards regression of prognostic markers and clinical status**

|                                             | Coefficient | HR<br>(95% CI)       | Standard<br>error of<br>coefficient | z      | P value               |     |
|---------------------------------------------|-------------|----------------------|-------------------------------------|--------|-----------------------|-----|
| <b>TP53 exon 4-5 missense mut</b>           |             |                      |                                     |        |                       |     |
| TP53 exon 4-5 missense mut                  | 0.989       | 2.69<br>(1.60-4.52)  | 0.2650                              | 3.730  | 1.91*10 <sup>-4</sup> | *** |
| Treatment (Gefitinib vs VP)                 | -0.850      | 0.43<br>(0.28-0.65)  | 0.2096                              | -4.040 | 5.35*10 <sup>-5</sup> | *** |
| Age                                         | -0.001      | 0.999<br>(0.98-1.02) | 0.0117                              | -0.107 | 0.91                  |     |
| Sex                                         | 0.278       | 1.32<br>(0.75-2.33)  | 0.2887                              | 0.963  | 0.34                  |     |
| Smoking history                             | 0.333       | 1.39<br>(0.74-2.62)  | 0.3224                              | 1.032  | 0.30                  |     |
| Clinical stage                              | 0.172       | 1.19<br>(0.23-6.07)  | 0.8321                              | 0.207  | 0.84                  |     |
| Lymph node status                           | 0.463       | 1.59<br>(0.32-7.96)  | 0.8221                              | 0.563  | 0.57                  |     |
| <b>TP53 frameshift &amp; truncating mut</b> |             |                      |                                     |        |                       |     |
| TP53 frameshift & truncating mut            | 0.525       | 1.69<br>(1.08-2.65)  | 0.2294                              | 2.290  | 0.022                 | *   |
| Treatment (Gefitinib vs VP)                 | -0.676      | 0.51<br>(0.34-0.76)  | 0.2023                              | -3.341 | 8.36*10 <sup>-4</sup> | *** |
| Age                                         | -0.001      | 0.999<br>(0.98-1.02) | 0.0115                              | -0.070 | 0.94                  |     |
| Sex                                         | 0.280       | 1.32<br>(0.75-2.33)  | 0.2894                              | 0.967  | 0.33                  |     |
| Smoking history                             | 0.187       | 1.21<br>(0.63-2.31)  | 0.3313                              | 0.564  | 0.57                  |     |
| Clinical stage                              | 0.147       | 1.16<br>(0.27-5.01)  | 0.7475                              | 0.197  | 0.84                  |     |
| Lymph node status                           | 0.405       | 1.50<br>(0.35-6.42)  | 0.7426                              | 0.545  | 0.59                  |     |
| <b>PIK3CA mut</b>                           |             |                      |                                     |        |                       |     |
| PIK3CA mut                                  | -0.777      | 0.46<br>(0.24-0.88)  | 0.3312                              | -2.347 | 0.019                 | *   |
| Treatment (Gefitinib vs VP)                 | -0.687      | 0.50<br>(0.34-0.75)  | 0.2026                              | -3.392 | 6.93*10 <sup>-4</sup> | *** |
| Age                                         | 0.001       | 1.00<br>(0.98-1.02)  | 0.0114                              | 0.085  | 0.93                  |     |

|                                |        |                      |        |        |                       |     |
|--------------------------------|--------|----------------------|--------|--------|-----------------------|-----|
| Sex                            | 0.219  | 1.24<br>(0.70-2.21)  | 0.2937 | 0.745  | 0.46                  |     |
| Smoking history                | 0.218  | 1.24<br>(0.65-2.36)  | 0.3280 | 0.663  | 0.51                  |     |
| Clinical stage                 | 0.581  | 1.79<br>(0.32-10.10) | 0.8849 | 0.656  | 0.51                  |     |
| Lymph node status              | 0.005  | 1.01<br>(0.18-5.61)  | 0.8771 | 0.006  | 1.00                  |     |
| <b>MYC gain</b>                |        |                      |        |        |                       |     |
| MYC gain                       | -1.047 | 0.35<br>(0.14-0.89)  | 0.473  | -2.214 | 0.027                 | *   |
| Treatment<br>(Gefitinib vs VP) | -0.670 | 0.51<br>(0.34-0.76)  | 0.202  | -3.308 | 9.39*10 <sup>-4</sup> | *** |
| Age                            | -0.005 | 1.00<br>(0.97-1.02)  | 0.011  | -0.399 | 0.690                 |     |
| Sex                            | 0.248  | 1.28<br>(0.73-2.26)  | 0.290  | 0.855  | 0.393                 |     |
| Smoking history                | 0.279  | 1.32<br>(0.70-2.49)  | 0.323  | 0.864  | 0.388                 |     |
| Clinical stage                 | -0.013 | 0.99<br>(0.22-4.35)  | 0.757  | -0.017 | 0.986                 |     |
| Lymph node status              | 0.609  | 1.84<br>(0.42-8.01)  | 0.751  | 0.812  | 0.417                 |     |
| <b>NOTCH1 mut</b>              |        |                      |        |        |                       |     |
| NOTCH1 mut                     | 0.907  | 2.48<br>(1.12-5.47)  | 0.404  | 2.244  | 0.025                 | *   |
| Treatment<br>(Gefitinib vs VP) | -0.714 | 0.49<br>(0.33-0.73)  | 0.203  | -3.527 | 4.20*10 <sup>-4</sup> | *** |
| Age                            | -0.003 | 1.00<br>(0.98-1.02)  | 0.011  | -0.218 | 0.83                  |     |
| Sex                            | 0.391  | 1.48<br>(0.85-2.58)  | 0.284  | 1.375  | 0.17                  |     |
| Smoking history                | 0.449  | 1.57<br>(0.84-2.92)  | 0.317  | 1.415  | 0.16                  |     |
| Clinical stage                 | 0.054  | 1.06<br>(0.23-4.91)  | 0.784  | 0.069  | 0.95                  |     |
| Lymph node status              | 0.517  | 1.68<br>(0.37-7.7)   | 0.777  | 0.665  | 0.51                  |     |

VP, adjuvant chemotherapy regimen of vinorelbine plus cisplatin.

HR, hazard ratio;

CI, confidence interval;

P values are derived from two-sided wald test of the cox proportional hazards regression model.

Significant codes: '\*\*\*',  $p < 0.001$ ; '\*\*',  $p < 0.01$ ; '\*',  $p < 0.05$ ; '.',  $p < 0.1$ .
